# Supplementary material
Source: PubMed Central journal article supplement (PMC1287962)

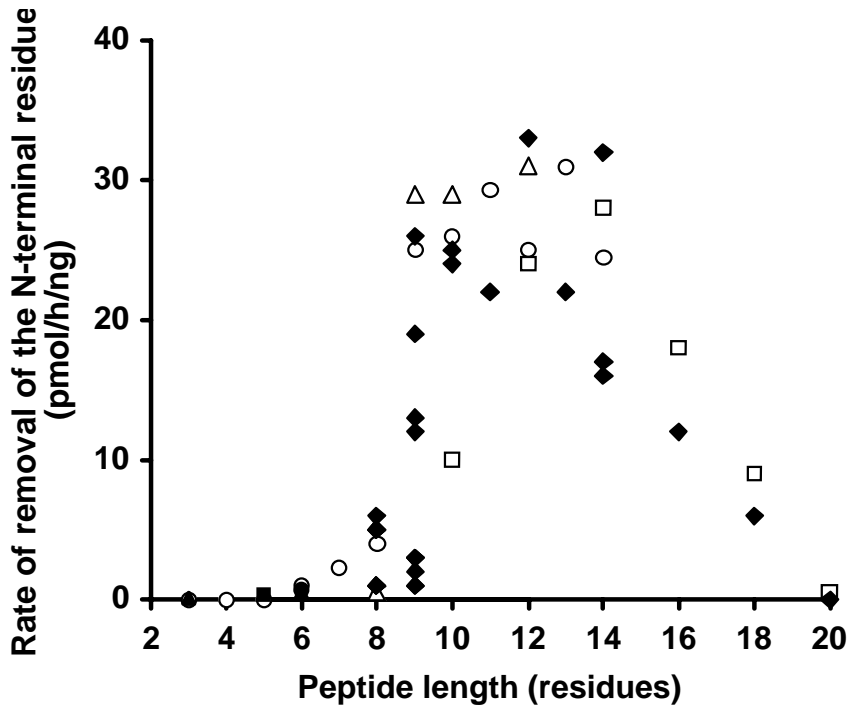

Supplement: pnas_0500721102_1.pdf [file pnas_0500721102_1.pdf]

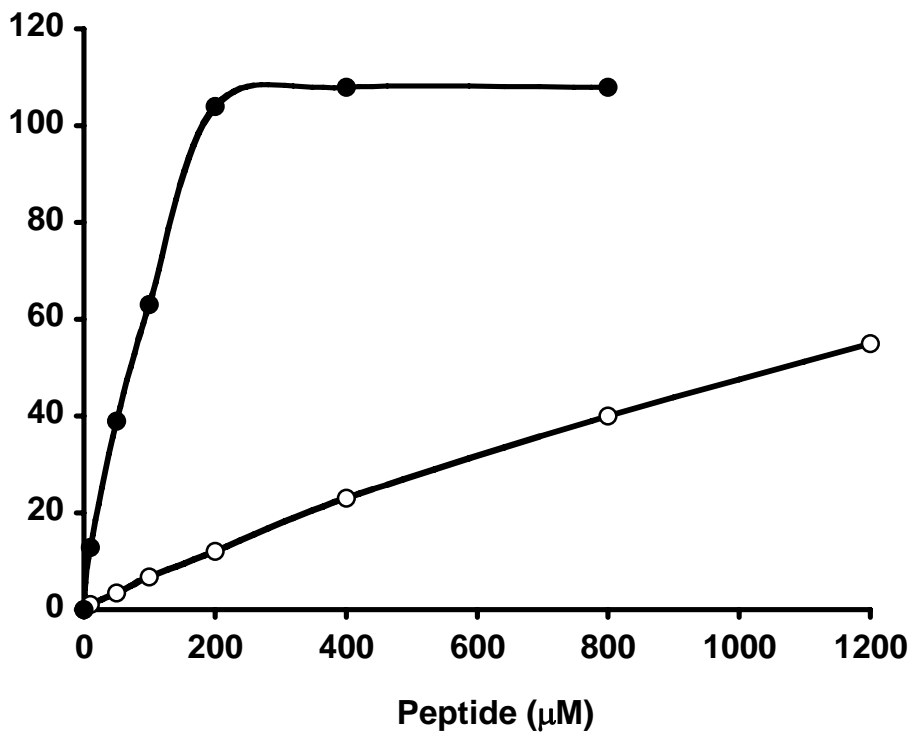

Supplement: pnas_0500721102_2.pdf [file pnas_0500721102_2.pdf]
